# Supplementary material for: Ginsenoside Rh2 epigenetically regulates cell-mediated immune pathway to inhibit proliferation of MCF-7 breast cancer cells
Source: PubMed Central journal article supplement — J Ginseng Res. 2017 May 18;42(4):455–62. doi: 10.1016/j.jgr.2017.05.003 (PMC6187096; doi:10.1016/j.jgr.2017.05.003), 2017-05-18
Supplement: mmc1.pdf [file mmc1.pdf]

**Ginsenoside Rh2 epigenetically regulates cell-mediated immune pathway to inhibit proliferation of MCF-7 breast cancer cells**

Hyunkyung Lee, Seungyeon Lee, Dawoon Jeong, and Sun Jung Kim

**Supplementary Information**

**Table S1.** Sequences of primers employed for real time polymerase chain reaction

| Gene Symbol     | Primer sequence (5'→3')        |
|-----------------|--------------------------------|
| <i>SAMM50</i>   | F : TCAAGGTGATGACGCACTTC       |
|                 | R : AAGCTTGAGGCCAAGTACCA       |
| <i>CASP1</i>    | F : AAATTTTCCGCAAGGTTCG        |
|                 | R : ACTTCCTGCCACAGACATT        |
| <i>INSL5</i>    | F : ATCTCAGAAGTGCGGAGCAA       |
|                 | R : CAGCTTGCTGAGCTTGAGG        |
| <i>TCF4</i>     | F : AAAAGGGACAGCGAGTTTGA       |
|                 | R : GATGGAGCATAGACCGCTTT       |
| <i>OR52A1</i>   | F : AAT CTG AGC GCA GTC TCC AT |
|                 | R : CAC ATT TGA AGC AAG CAG GA |
| <i>CLINT1</i>   | F : CAGCCAGTCAACAGGAGGAT       |
|                 | R : TGTTGCTGTTACTTGGGAAGG      |
| <i>ST3GAL4</i>  | F : ATCTCCCGGGAAGACAGTTT       |
|                 | R : CGGGAGTAGTTGCCAAAGAG       |
| <i>C1orf198</i> | F : TCCTGGGAAACAAAGAGTCAG      |
|                 | R : GGAAGCTTTGGACAGTGGTC       |
| <i>RNLS</i>     | F : AGGACTCAGGGGGAAGAATG       |
|                 | R : TGGCATAATGAGGAGTGCAG       |
| <i>GAPDH</i>    | F : ACATCGCTCAGACACCATG        |
|                 | R : TGTAGTTGAGGTCAATGAAGGG     |

**Fig. S1.** Effect of ginsenoside Rh2 on the *Alu* methylation level in MCF-7 cells. The methylation levels of the three CpGs on the *Alu* from the MCF-7 cells were determined by pyrosequencing after treatment with Rh2. (A) The *Alu* sequence adopted in this study. The analyzed three CpGs are indicated in red and numbered. (B) Bar graphs representing the methylation levels of CpGs of *Alu* in the MCF-7. Five independent experiments were carried out for individual CpG and average levels are given with the standard errors.

**A**

```

1  ggccgggcgga ggccggggcgc ggtggctcac gcctgtaate ccagcacttt gggaggaaga
61  tcacctgagg tcaggagtgc gagaccagcc tggccaacat ggtgaaaccc cgtctctact
121  aaaaatacaa aaattagccg ggcgtggtgg cgccgcgcctg taatcccagc tactcgggag
                                     1 2 3
181  gctgaggcag gagaatcgc tgaacccggg aggcggaggt tgcagtgagc cgagatcgcg
231  ccactgcact ccagcctggg cgacagagcg agactccgtc tcaaaaaaaaa

```

**B**

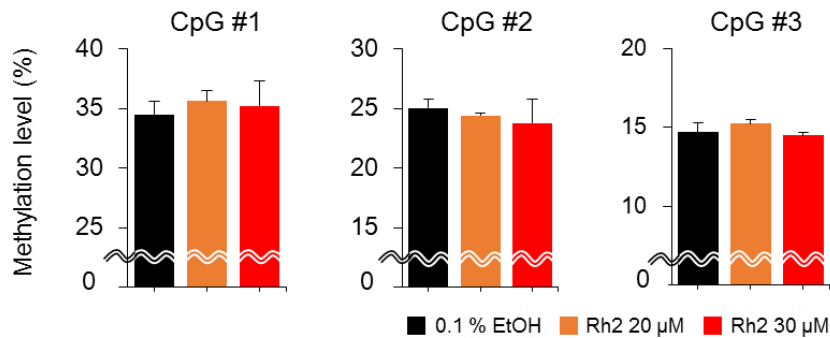

EtOH, ethanol.
